# Supplementary material for: Biosecurity and Lairage Time versus Pork Meat Quality Traits in a Farm–Abattoir Continuum
Source: MDPI journal article supplement (doi:10.3390/ani12233382), 2022-12-01
Supplement: s1 [file s1]

## Supplementary Materials

**Table S1.** External, internal and total biosecurity scores based on their specific sub-categories on four commercial fattening pigs' farms.

|                                                                      | Fattening pigs' farms |           |           |           |
|----------------------------------------------------------------------|-----------------------|-----------|-----------|-----------|
|                                                                      | Farm 1                | Farm 2    | Farm 3    | Farm 4    |
| <i>External biosecurity subcategories (%)</i>                        |                       |           |           |           |
| A. Purchase of breeding pigs, piglets and semen                      | 100                   | 100       | 96        | 96        |
| B. Transport of animals, removal of carcasses and manure             | 38                    | 48        | 48        | 38        |
| C. Feed, water and equipment supply                                  | 33                    | 33        | 40        | 13        |
| D. Visitors and farmworkers                                          | 59                    | 47        | 47        | 29        |
| E. Vermin and bird control                                           | 50                    | 50        | 50        | 20        |
| F. Location of the farm                                              | 100                   | 80        | 100       | 80        |
| <b>External biosecurity</b>                                          | <b>64</b>             | <b>62</b> | <b>64</b> | <b>50</b> |
| <i>Internal biosecurity subcategories (%)</i>                        |                       |           |           |           |
| G. Disease management                                                | 20                    | 80        | 20        | 20        |
| H. Farrowing and suckling period                                     | N/A                   | N/A       | N/A       | N/A       |
| I. Nursery unit                                                      | 86                    | 86        | 27        | 21        |
| J. Finishing unit                                                    | 93                    | 79        | 50        | 47        |
| K. Measures between compartments, working lines and use of equipment | 29                    | 18        | 18        | 14        |
| L. Cleaning and disinfection                                         | 60                    | 50        | 40        | 10        |
| <b>Internal biosecurity</b>                                          | <b>55</b>             | <b>54</b> | <b>31</b> | <b>20</b> |
| <b>Total biosecurity</b>                                             | <b>60</b>             | <b>58</b> | <b>48</b> | <b>35</b> |

**Table S2.** Transport variables (loading time, transport duration, slipping, vocalization).

| Variable                 | Fattening pigs' farms |        |        |        |
|--------------------------|-----------------------|--------|--------|--------|
|                          | Farm 1                | Farm 2 | Farm 3 | Farm 4 |
| Loading time (min)       | 45-55                 | 37-45  | 50-55  | 31-35  |
| Transport duration (min) | 5-7                   | 26-30  | 60-70  | 55-65  |
| Slipping (%)             | 20                    | 10     | 50     | 28     |
| Vocalization (%)         | 40                    | 3      | 18     | 5      |

**Table S3.** Multivariate regression models predicting carcass and meat quality traits.

|                             | R Square | $\beta$     | 95% CI           | p value | p value (model) |
|-----------------------------|----------|-------------|------------------|---------|-----------------|
| <i>Carcass weight (kg)</i>  |          |             |                  |         |                 |
| Farm TBS                    |          | -0.130      | (-0.275, 0.015)  | 0.079   |                 |
| Lairage time                | 0.086    | 0.112       | (-0.031, 0.256)  | 0.123   | 0.039           |
| Farm TBS×L                  |          | -0.013      | (-0.027, 0.002)  | 0.081   |                 |
| <i>Carcass yield (%)</i>    |          |             |                  |         |                 |
| Farm TBS                    |          | -0.052      | (-0.128, 0.023)  | 0.174   |                 |
| Lairage time                | 0.312    | 0.223       | (0.148, 0.298)   | <0.0001 | <0.0001         |
| Farm TBS×L                  |          | 0.028       | (-0.016, -0.001) | 0.028   |                 |
| <i>Chilling yield (%)</i>   |          |             |                  |         |                 |
| Farm TBS                    |          | 0.007       | (0.005, 0.009)   | <0.0001 |                 |
| Lairage time                | 0.655    | 0.012       | (0.010, 0.015)   | <0.0001 | <0.0001         |
| Farm TBS×L                  |          | -6.556E-005 | (0.0001, 0.0001) | 0.549   |                 |
| <i>Temperature 24h (°C)</i> |          |             |                  |         |                 |
| Farm TBS                    | 0.126    | -0.021      | (-0.035, -0.007) | 0.003   | 0.006           |

|                 |       |        |                 |       |       |
|-----------------|-------|--------|-----------------|-------|-------|
| Lairage time    |       | 0.014  | (0.0001, 0.028) | 0.045 |       |
| Farm TBS×L      |       | 0.0001 | (-0.002, 0.001) | 0.710 |       |
| <i>a* value</i> |       |        |                 |       |       |
| Farm TBS        |       | 0.049  | (0.001, 0.097)  | 0.046 |       |
| Lairage time    | 0.136 | 0.057  | (0.010, 0.105)  | 0.019 | 0.004 |
| Farm TBS×L      |       | 0.005  | (0.0001, 0.010) | 0.032 |       |

CI: confidence interval; TBS: total biosecurity score, L: lairage time, Farm TBS×L: interaction
